# Supplementary material for: TiO2–multi-walled carbon nanotube nanocomposites: hydrothermal synthesis and temporally-dependent optical properties
Source: Royal Society of Chemistry journal article supplement (doi:10.1039/c5ra26677g), 2016-01-01
Supplement: c5ra26677g1.pdf [file c5ra26677g1.pdf]

## Supporting Information

### **TiO<sub>2</sub>-multi-walled carbon nanotube nanocomposites: hydrothermal synthesis and temporally-dependent optical properties**

Aijian Wang,<sup>a,b</sup> Yun Wang,<sup>a</sup> Wang Yu<sup>a</sup>, Yu Fang,<sup>c</sup> Lingliang Long,<sup>a</sup> Yinglin Song,<sup>c</sup>  
Marie P. Cifuentes,<sup>d</sup> Mark G. Humphrey,<sup>d</sup> Long Zhang,<sup>b</sup> Jianda Shao<sup>b</sup> and Chi  
Zhang<sup>\*a,b</sup>

<sup>a</sup> China-Australia Joint Research Center for Functional Molecular Materials  
School of Chemical and Material Engineering, Jiangnan University Wuxi 214122, P.  
R. China  
E-mail: chizhang@jiangnan.edu.cn, Fax: (+86)-510-85917763

<sup>b</sup> Key Laboratory of Materials for High-Power Laser, Shanghai Institute of Optics and  
Fine Mechanics, Chinese Academy of Sciences, Shanghai 201800, P. R. China

<sup>c</sup> School of Physical Science and Technology, Soochow University, Suzhou 215006, P.  
R. China

<sup>d</sup> Research School of Chemistry, Australian National University, Canberra, ACT 2601,  
Australia

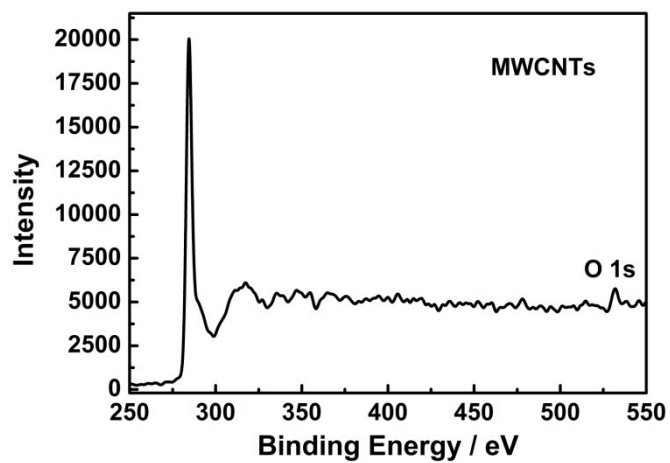

**Figure S1.** XPS wide-scan spectrum of MWCNTs.

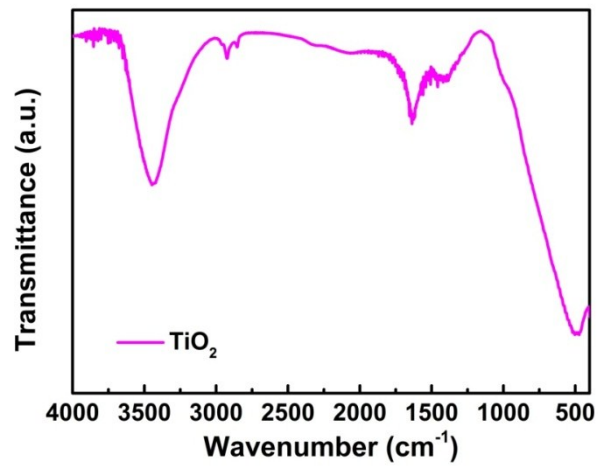

**Figure S2.** FTIR spectrum of TiO<sub>2</sub>.

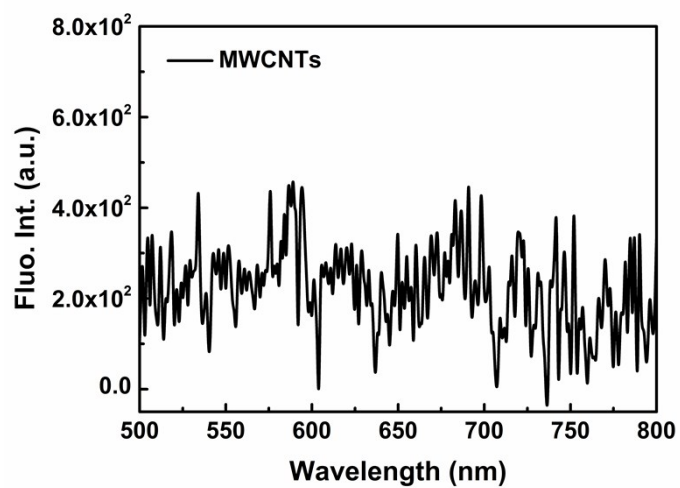

**Figure S3.** Fluorescence spectrum of the MWCNTs.

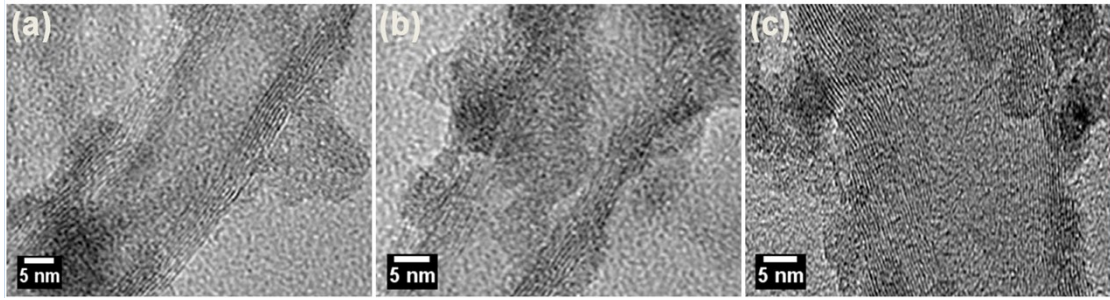

**Figure S4.** HRTEM images of (a) M0.25, (b) M0.50 and (c) M1.00.

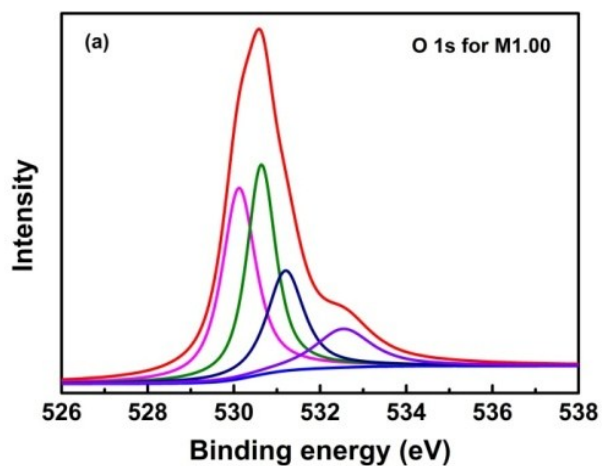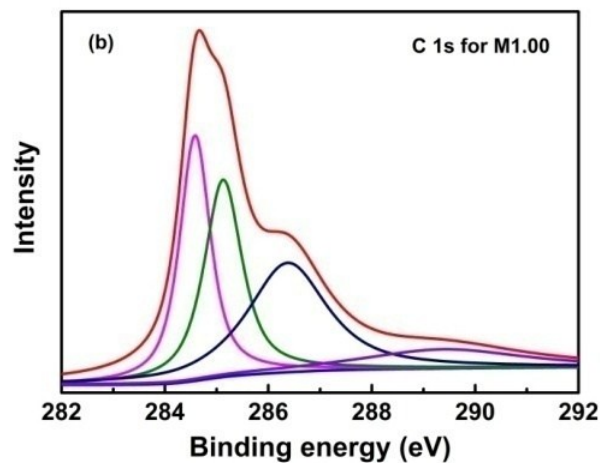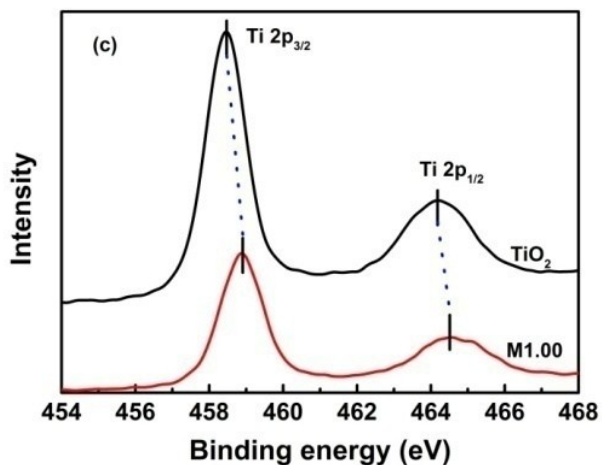

**Figure S5.** High-resolution XPS spectra of (a) O 1s and (b) C 1s for M1.00, and (c) the Ti 2p core level XPS spectra of TiO<sub>2</sub> and M1.00.

Further information regarding the chemical and bonding environment of TiO<sub>2</sub> and the TiO<sub>2</sub>/MWCNT nanocomposites was ascertained from XPS studies. With respect

to the XPS O 1s spectrum of M1.00 in Figure S5a, the asymmetric and broad O 1s peak is due to different oxygen bonds and environments. The four peaks at 530.1, 530.7, 531.2 and 532.6 eV from fitting the O 1s spectrum of M1.00 are ascribed to lattice oxygen, carbonyl, phenol, and carboxyl groups, respectively.<sup>1</sup> Similarly, the C 1s peak can be fitted to four peaks (Figure S5b) at 284.6, 285.1, 286.4, and 289.6 eV ascribed to the sp<sup>2</sup> hybridized carbon of the MWCNTs, and C-O, C=O, and O=C-O species, respectively.<sup>2</sup> With such surface functional groups, the TiO<sub>2</sub> may be grafted onto the MWCNTs' surfaces via C-O-Ti bonds, such structures facilitating the desired charge transfer upon light excitation.<sup>3</sup> However, no peak was observed at 283.1 eV, strongly suggesting that the carbon atoms do not directly enter the TiO<sub>2</sub> lattice, presumably a result of the low synthesis temperature. Figure S5c shows the Ti core XPS spectra of TiO<sub>2</sub> and the M1.00 nanocomposite. The Ti core-level XPS spectrum of TiO<sub>2</sub> exhibits two peaks centered at 464.3 and 458.6 eV, corresponding respectively to the Ti 2p<sub>1/2</sub> and Ti 2p<sub>3/2</sub> photoelectrons in the Ti<sup>4+</sup> state.<sup>4</sup> For the M1.00 nanocomposite, these two peaks occur at 464.6 and 458.9 eV, respectively. In each sample, the Ti 2p<sub>1/2</sub> and Ti 2p<sub>3/2</sub> spin-orbit splitting is 5.7 eV, consistent with the presence of Ti<sup>4+</sup> in the TiO<sub>2</sub> and M1.00 nanocomposite. This shift may be due to bonding between oxygen and carbon present in the MWCNTs. The O/Ti atomic ratio is ca. 2.6, which is higher than that of 2 for pure TiO<sub>2</sub>. This may be because some oxygen is contributed from the MWCNTs. Similar results are seen for M0.25 and M0.50 as with M1.00, the results being shown in Figures S6 and S7.

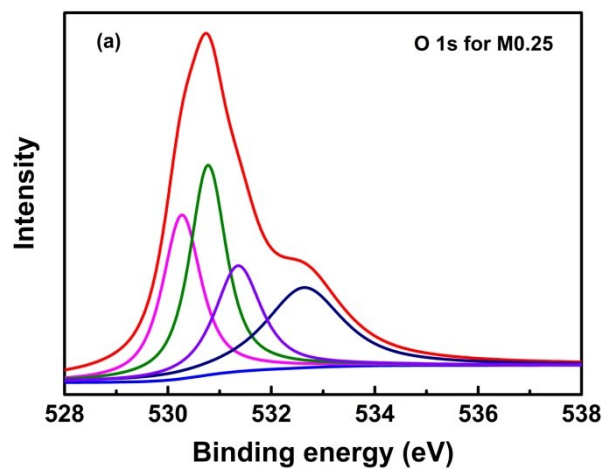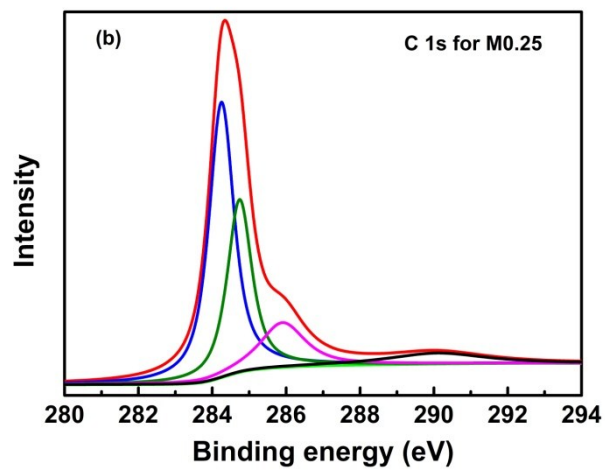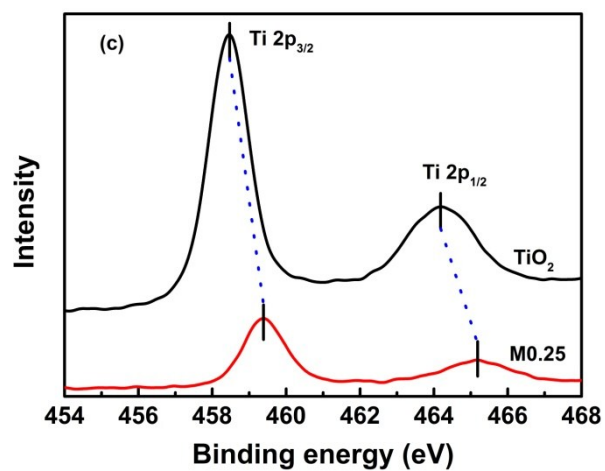

**Figure S6.** High resolution XPS spectra of (a) O 1s and (b) C 1s for M0.25, and (c) Ti 2p core level XPS spectra of TiO<sub>2</sub> and M0.25.



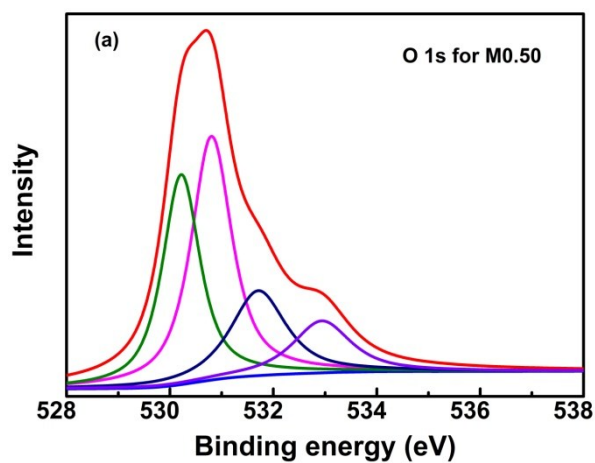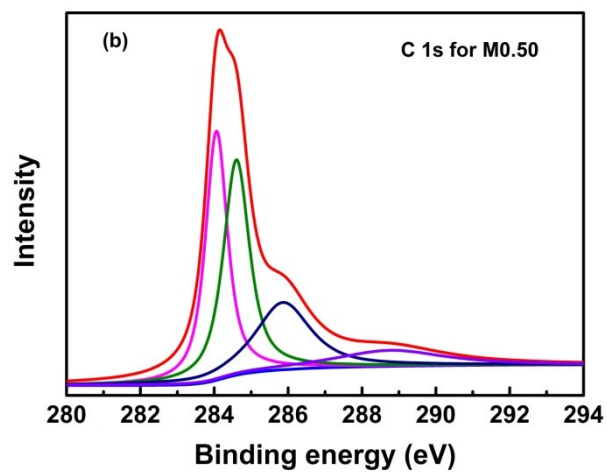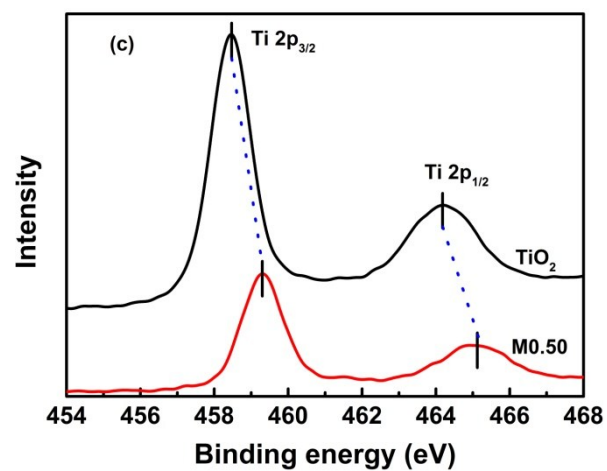

**Figure S7.** High resolution XPS spectra of (a) O 1s and (b) C 1s for M0.50, and (c) Ti 2p core level XPS spectra of TiO<sub>2</sub> and M0.50.

## References

- 1 X. B. Yan, B. K. Tay and Y. Yang, *J. Phys. Chem. B* 2006, **110**, 25844.
- 2 H. T. Fang, C. G. Liu, C. Liu, F. Li, M. Liu and H. M. Cheng, *Chem. Mater.* 2004, **16**, 5744.
- 3 D. L. Zhao, X. Yang, C. L. Chen and X. K. Wang, *J. Colloid Interface Sci.* 2013, **398**, 234.
- 4 A. J. Wang, W. Yu, Y. Fang, Y. L. Song, D. Jia, L. L. Long, M. P. Cifuentes, M. G. Humphrey and C. Zhang, *Carbon* 2015, **89**, 130.
